# Supplementary material for: Candidate genes expression profiling during wilting in chickpea caused by Fusarium oxysporum f. sp. ciceris race 5
Source: PubMed Central journal article supplement (PMC6808423; doi:10.1371/journal.pone.0224212), 2019-10-23

LOC101503802

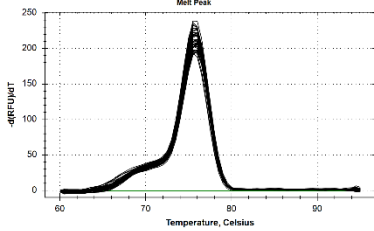

LOC101505941

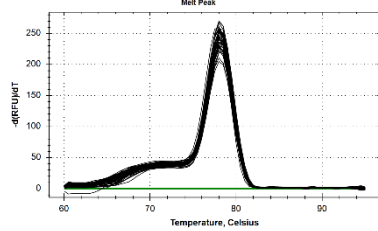

LOC101506693

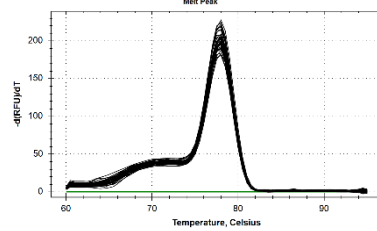

LOC101507659

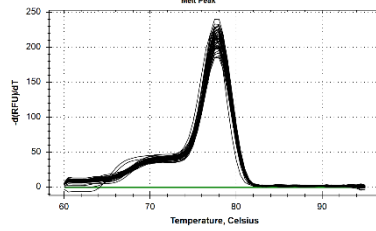

LOC101508507

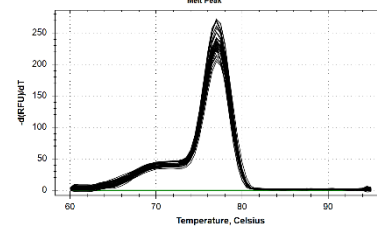

LOC101509037

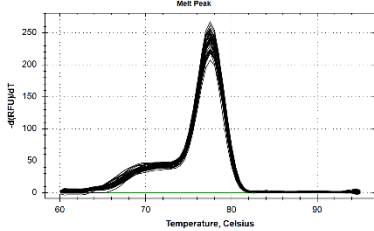

LOC101509359

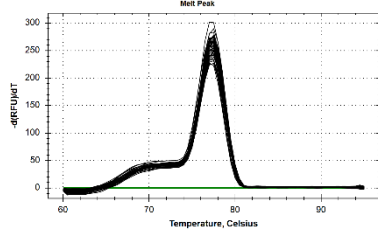

LOC101510206

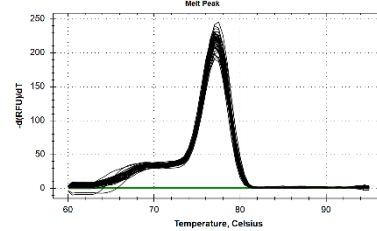

LOC101510544

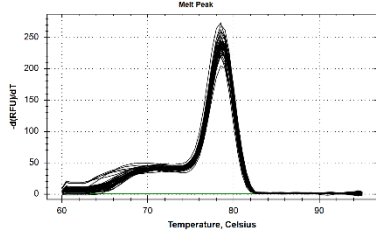

LOC101511605

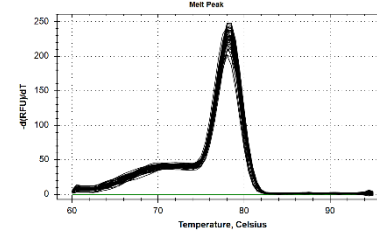

LOC101495287

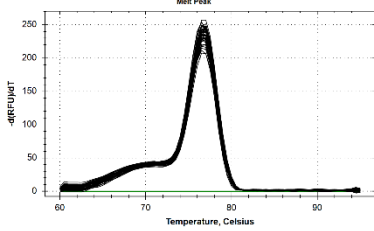

LOC101495941

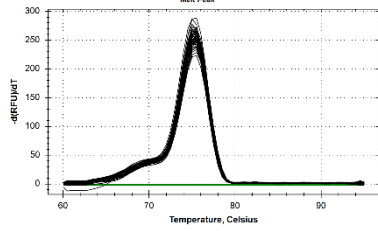

LOC101496824

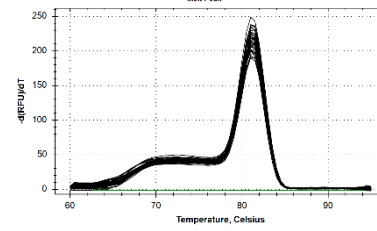

LOC101497351

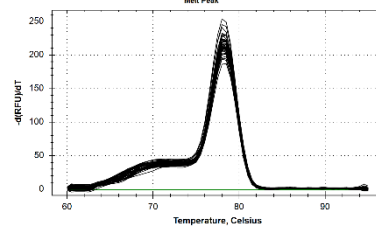

LOC101497678

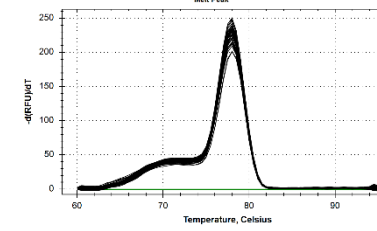

LOC101502928

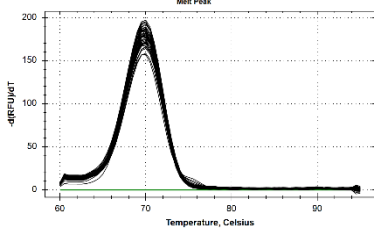

LOC101499218

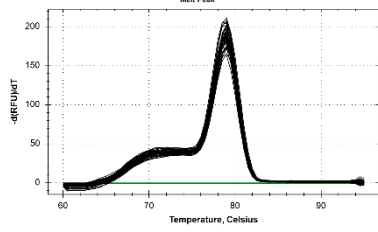

LOC101501552

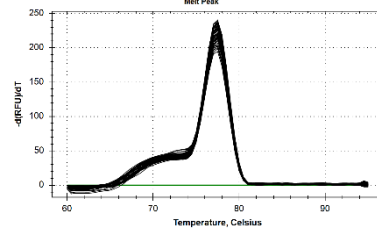

LOC101510320

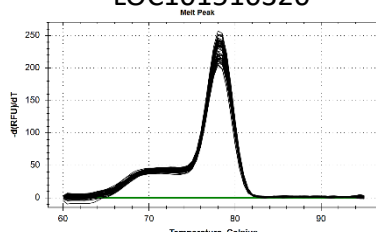

LOC101499873

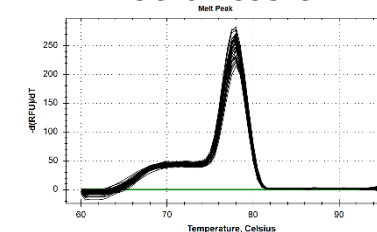

LOC101490851

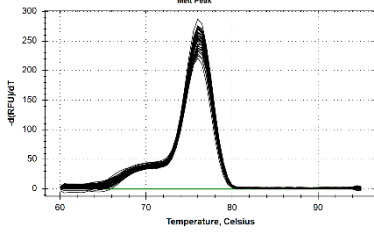

LOC105852647

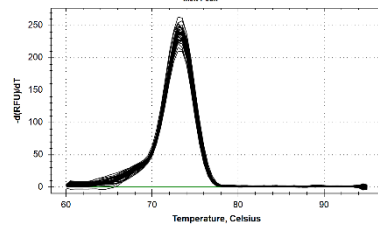

Supplement: pone.0224212.s002.pdf [file pone.0224212.s002.pdf]
