# Supplementary material for: Candidate genes expression profiling during wilting in chickpea caused by Fusarium oxysporum f. sp. ciceris race 5
Source: PubMed Central journal article supplement (PMC6808423; doi:10.1371/journal.pone.0224212), 2019-10-23

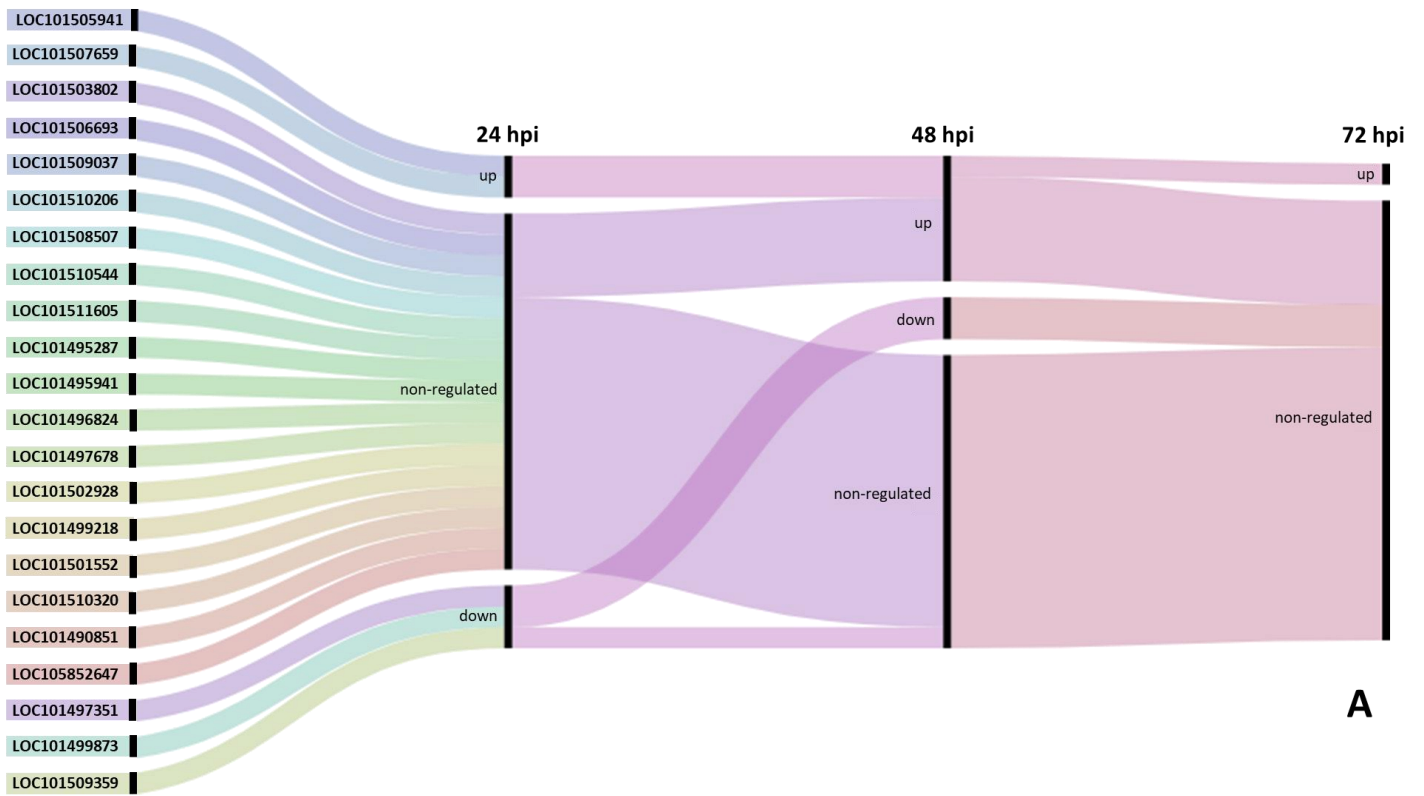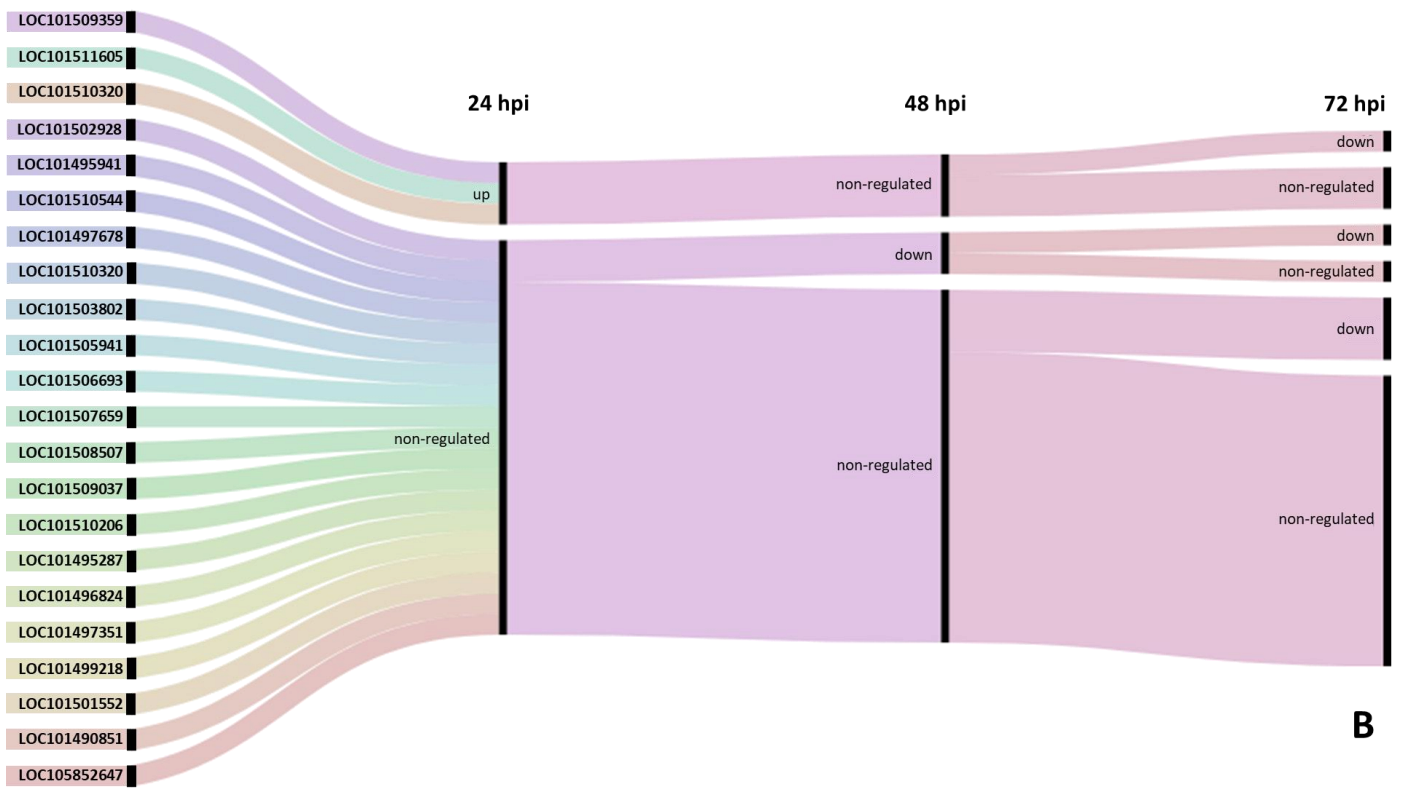

Supplement: pone.0224212.s005.pdf [file pone.0224212.s005.pdf]
